# Supplementary material for: Genomic adaptation of the picoeukaryote Pelagomonas calceolata to iron-poor oceans revealed by a chromosome-scale genome sequence
Source: PubMed Central journal article supplement (PMC9481584; doi:10.1038/s42003-022-03939-z), 2022-09-16
Supplement: 42003_2022_3939_MOESM3_ESM.pdf [file 42003_2022_3939_MOESM3_ESM.pdf]

## Description of Additional Supplementary Files

**File name:** Supplementary Data 1

**Description:** Assembly metrics issued by state-of-the-art tools for de novo genome assembly using long reads. For each assembler, the metrics of 3 separate runs are reported, based on the all sets (All), the longest (Longest) and the best quality (Filtlong) ONT long reads.

**File name:** Supplementary Data 2

**Description:** Functional annotation of *P. calceolata* genes

**File name:** Supplementary Data 3

**Description:** Introns overlapping repeat. Metrics of introns overlapping the repeats detected ab initio using RepeatScout. For 15% of the introns, the repeat represents more than 90% of the intron length.

**File name:** Supplementary Data 4

**Description:** Detailed BUSCO (v 5.0.0) results on *P. calceolata* genome. The lineage dataset used is: stramenopiles\_odb10 (Creation date: 2020-08-05, number of species: 27, number of BUSCOs: 100)

**File name:** Supplementary Data 5

**Description:** Gene structure in low-GC regions and other genomic regions.

**File name:** Supplementary Data 6

**Description:** Pfam domain enrichment in genes present in low-GC regions compared to other chromosomal regions. Pfam domain with adjusted p-value < 0.01 are presented.

**File name:** Supplementary Data 7

**Description:** Putative meiotic genes identified in *P. calceolata* genome. Kegg Orthology p-values with a star are above the HMM threshold defined by KoFamKoala tool. Their expression levels in exponential growth are indicated in the two last columns of the table.

**File name:** Supplementary Data 8

**Description:** 10 most abundant 18S V9 rRNA OTUs in average of all Tara Oceans samples of the 0.8 - 5  $\mu$ m size-fraction. The average abundance per oceanic layer is provided (SUR=Surface, DCM=Deep-chlorophyll maximum, MES=Mesopelagic).

**File name:** Supplementary Data 9

**Description:** Genes involved in nitrogen and iron metabolisms in the *P. calceolata* genome compared to other small photosynthetic eukaryotes.

**File name:** Supplementary Data 10

**Description:** *P. calceolata* relative abundance in each sample and associated environmental parameters.
